# Supplementary material for: Morphometric and Nanomechanical Features of Platelets from Women with Early Pregnancy Loss Provide New Evidence of the Impact of Inherited Thrombophilia
Source: MDPI journal article supplement (doi:10.3390/ijms22157778), 2021-07-21
Supplement: s1 [file s1]

# Morphometric and Nanomechanical Features of Platelets from Women with Early Pregnancy Loss Provide New Evidence of the Impact of Inherited Thrombophilia

Tonya Andreeva <sup>1</sup>, Regina Komsa-Penkova <sup>2</sup>, Ariana Langari <sup>1</sup>, Sashka Krumova <sup>1</sup>, Georgi Golemanov <sup>2</sup>,  
Galya B. Georgieva <sup>2</sup>, Stefka G. Taneva <sup>1</sup>, Ina Giosheva <sup>1,3</sup>, Nikolina Mihaylova <sup>4</sup>, Andrey Tchorbanov <sup>4</sup>  
and Svetla Todinova <sup>1,\*</sup>

<sup>1</sup> Institute of Biophysics and Biomedical Engineering, Bulgarian Academy of Sciences, Acad. Georgi Bonchev, Str. Bl. 21, 1113 Sofia, Bulgaria; t\_andreeva@abv.bg (T.A.); arianalangari@abv.bg (A.L.); sashka.b.krumova@gmail.com (S.K.); sgtaneva@gmail.com (S.G.T.); ina\_gi@abv.bg (I.G.)

<sup>2</sup> Department of Biochemistry, Medical University, 1 St. Kliment Ohridski Str., 5800 Pleven, Bulgaria; rkomsa@gmail.com (R.K.-P.); g.golemanov@abv.bg (G.G.); galiag\_77@abv.bg (G.B.G.)

<sup>3</sup> University Obstetrics and Gynecology Hospital "Maichin Dom", 2 Zdrave Str., 1463 Sofia, Bulgaria

<sup>4</sup> Stefan Angelov Institute of Microbiology, Bulgarian Academy of Sciences, Acad. Georgi Bonchev, Str. Bl. 26, 1113 Sofia, Bulgaria; mihaylova\_n@microbio.bas.bg (N.M.); tchorban@microbio.bas.bg (A.T.)

\* Correspondence: todinova@abv.bg

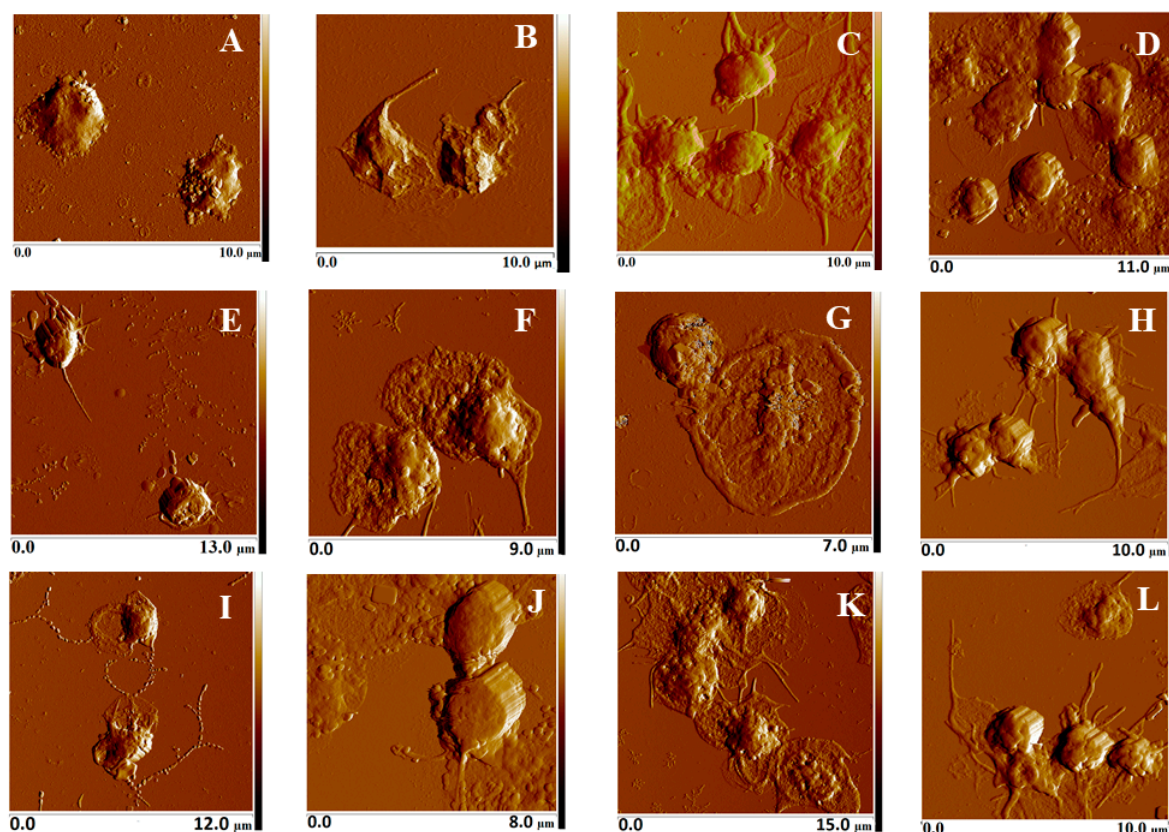

**Figure S1.** Representative AFM images of groups of platelets isolated from women without established pregnancy (CNP - A, E, I); control pregnant women (CP - B, F, J); women with early pregnancy loss subset EPL1 (embryonic stage of gestational development - C, G, K) and EPL2 (placental stage of gestational development - D, H, L). The images were taken in tapping mode, in the air, at room temperature.

**Table S1.** Polymorphism in the genes of thrombophilia factors (FVL, FII20210A, MTHFR, PLA1/A2, or 4G/4GPAI-1) determined for CNP, CP, EPL1 and EPL2 groups. Number of cases (n) of carriage of polymorphisms in the thrombophilia of genetic factors determined for each of the respective groups.

| Groups | Mutations  |                  |              |                |                    |
|--------|------------|------------------|--------------|----------------|--------------------|
|        | FVL<br>(n) | FII20210A<br>(n) | MTHFR<br>(n) | PLA1/A2<br>(n) | 4G/4G PAI-1<br>(n) |
| CNP    | -          | 1                | -            | -              | 1                  |
| CP     |            |                  | 1            | 1              |                    |
| EPL1   | 3          | 2                | 3            | 3              | 4                  |
| EPL2   | 2          |                  |              | 1              |                    |
